# Supplementary material for: Simultaneous quantification of multiple endogenous biothiols in cancer cells based on a multi-signal fluorescent probe
Source: Royal Society of Chemistry journal article supplement (doi:10.1039/c9an00691e), 2019-01-01
Supplement: c9an00691e1.pdf [file c9an00691e1.pdf]

## Supporting Information

### Simultaneous quantification of multiple endogenous biothiols in cancer cells based on a multi-signal fluorescent probe

Bo Yin, Sha Sha Li, Shao Hua Lu, Jia Ying Mi, Hong Lin Zhai\*

*College of Chemistry & Chemical Engineering, Lanzhou University, Lanzhou, 730000, PR China*

\* Corresponding author: [zhaihl@163.com](mailto:zhaihl@163.com) (H.L. Zhai).

---

\* Correspondence to: Tel.: +86 931 8912596; fax: +86 931 8912582; E-mail address: [zhaihl@163.com](mailto:zhaihl@163.com) (H.L. Zhai).

## Tchebichef image moments

Tchebichef image moments (TMs) have the advantages of excellent description ability with the powerful multi-resolution capability and inherent invariance properties and have widely used in image processing.<sup>1,2</sup> The description of TMs is shown as follows:

For an image with a size of  $N \times M$ ,  $f(x, y)$  is the image intensity function at the position of  $(x, y)$ . So the image moments  $T_{n,m}$  with orders of  $n$  and  $m$  can be defined as:

$$T_{n,m} = \frac{1}{\rho(n, N)\rho(m, M)} \sum_{x=0}^{N-1} \sum_{y=0}^{M-1} t_n(x)t_m(y)f(x, y)$$

$(n = 0, 1, 2, \dots, N-1, m = 0, 1, 2, \dots, M-1)$

where  $\rho(n, N)$  and  $\rho(m, M)$  are the normalized square-norm.  $t_n(x)$  and  $t_m(y)$  are the discrete Tchebichef polynomial of  $n$  and  $m$ , respectively.

$$\sum_{x=0}^{N-1} t_m(x)t_n(x) = \rho(n, N)\delta_{nm} \quad (0 \leq n \leq N-1, 0 \leq m \leq M-1)$$

where  $\delta_{nm}$  is the Kronecker symbol,  $\rho(n, N)$  is the square-norm and  $t_n(x)$  is the discrete Tchebichef polynomial that confirms to the recurrence relation:

$$(n+1)t_{n+1}(x) - (2n+1)(2x-N+1)t_n(x) + n(N^2-n^2)t_{n-1}(x) = 0,$$

$n = 1, 2, \dots, N-1.$

In order to avoid the numerical error, the normalizing Tchebichef polynomial was proposed by Mukundan et al.<sup>3</sup> Then the Tchebichef moments can be defined as:

$$T_{n,m} = \frac{1}{\tilde{\rho}(n, N)\tilde{\rho}(m, M)} \sum_{x=0}^{N-1} \sum_{y=0}^{M-1} \tilde{t}_n(x)\tilde{t}_m(y)f(x, y),$$

$(n = 0, 1, 2, \dots, N-1, m = 0, 1, 2, \dots, M-1).$

The following normalized recurrence formulas are employed to accelerate the computation of Tchebichef polynomials:

$$\tilde{t}_n(x) = \frac{(2n-1)(2x-N+1)\tilde{t}_{n-1}(x)}{nN} - \frac{(n-1)[N^2-(n-1)^2]\tilde{t}_{n-2}(x)}{nN^2},$$

$$\tilde{t}_0(x) = 1,$$

$$\tilde{t}_1(x) = \frac{2x+1-N}{N},$$

$$\tilde{\rho}(n) = \left( \frac{2n-1}{2n+1} \right) \left( 1 - \frac{n^2}{N^2} \right) \tilde{\rho}(n-1),$$

$$\tilde{\rho}(0) = N.$$

The root mean square error (*RMSE*) can be calculated using the formula:

$$RMSE = \sqrt{\frac{\sum_{i=1}^n (y_i - \tilde{y}_i)^2}{n}}$$

where  $n$  is the number of the calibrated samples,  $y_i$  and  $\tilde{y}_i$  are the experimental and predicted values, respectively.

All calculation programs were written in M-file based on MATLAB 7.0 and carried out with a PC (CPU 4.00 GHz, RAM 32.0 GB). The MCR-ALS toolbox for MATLAB was downloaded from the website (<http://www.mcrals.info/>). N-PLS toolbox was downloaded from the website (<http://www.models.life.ku.dk/algorithms>).

## References

1. H. L. Zhai, B. Q. Li, J. Chen, X. Wang, M. L. Xu, J. J. Liu and S. H. Lu, *TrAC-Trends Anal. Chem.*, 2018, **103**, 119-125.
2. I. Batioua, R. Benouini, K. Zenkour, A. Zahi and E. Hakim, *Pattern Recogn.*, 2017, **71**, 264-277.
3. R. Mukundan, *IEEE. Trans. Image Process.*, 2004, **13**, 1055-1059.

The excitation spectrum of the three biothiols with a degree of partial overlap:

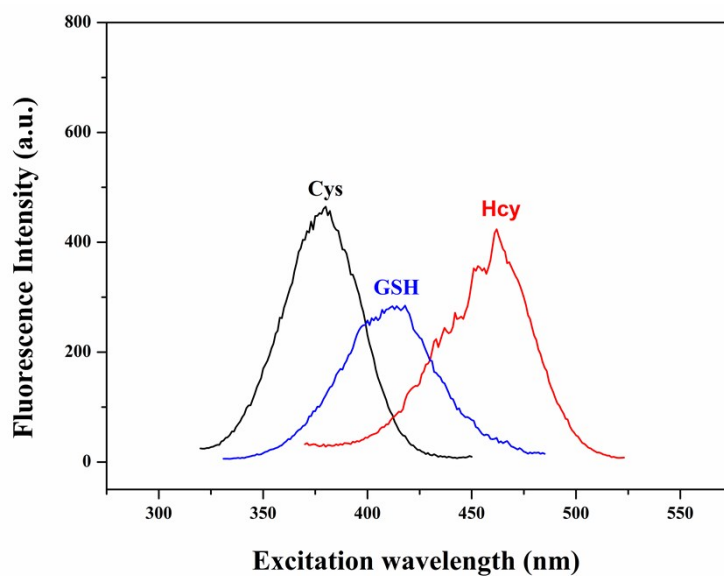

**Figure S1.** The excitation spectrum of the probe (10  $\mu\text{M}$ ) in the presence of 50  $\mu\text{M}$  Cys, 50  $\mu\text{M}$  GSH and 50  $\mu\text{M}$  Hcy in DMSO-PBS (v/v, 6/4) at room temperature recorded after 15 min later.

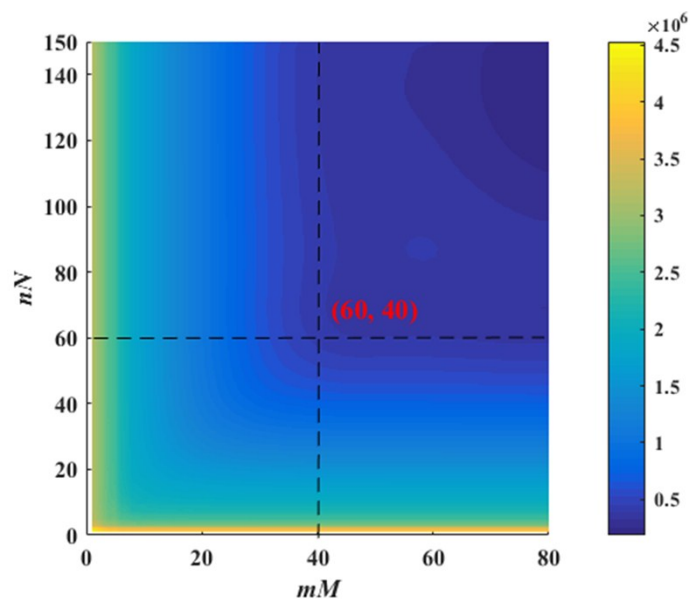

**Figure S2.** The approximate values of the maximum orders of  $nN$  and  $mM$  were obtained based on the reconstruction errors. (The reconstruction errors increases from the deep blue to yellow color)

**Table S1.** Experimental concentrations and calculated concentrations (mM) of the three thiols for different methods.

| No.             | Cys   |       |         |       | GSH   |       |         |       | Hcy   |       |         |       |
|-----------------|-------|-------|---------|-------|-------|-------|---------|-------|-------|-------|---------|-------|
|                 | Exp.  | Cal.  |         |       | Exp.  | Cal.  |         |       | Exp.  | Cal.  |         |       |
|                 |       | TM    | MCR-ALS | N-PLS |       | TM    | MCR-ALS | N-PLS |       | TM    | MCR-ALS | N-PLS |
| Calibration set |       |       |         |       |       |       |         |       |       |       |         |       |
| 15              | 0.018 | 0.018 | 0.021   | 0.017 | 0.057 | 0.058 | 0.067   | 0.061 | 0.026 | 0.026 | 0.025   | 0.026 |
| 13              | 0.080 | 0.076 | 0.070   | 0.077 | 0.079 | 0.080 | 0.076   | 0.077 | 0.060 | 0.060 | 0.057   | 0.060 |
| 20              | 0.011 | 0.012 | 0.008   | 0.011 | 0.065 | 0.069 | 0.062   | 0.067 | 0.010 | 0.011 | 0.011   | 0.011 |
| 23              | 0.010 | 0.011 | 0.007   | 0.010 | 0.062 | 0.066 | 0.063   | 0.067 | 0.015 | 0.012 | 0.011   | 0.014 |
| 11              | 0.045 | 0.044 | 0.054   | 0.044 | 0.025 | 0.024 | 0.025   | 0.021 | 0.012 | 0.012 | 0.017   | 0.013 |
| 5               | 0.035 | 0.036 | 0.039   | 0.034 | 0.052 | 0.052 | 0.059   | 0.051 | 0.044 | 0.043 | 0.047   | 0.046 |
| 21              | 0.014 | 0.012 | 0.010   | 0.012 | 0.072 | 0.068 | 0.063   | 0.067 | 0.005 | 0.006 | 0.011   | 0.010 |
| 22              | 0.015 | 0.013 | 0.010   | 0.012 | 0.078 | 0.078 | 0.075   | 0.078 | 0.017 | 0.016 | 0.016   | 0.016 |
| 1               | 0.060 | 0.061 | 0.056   | 0.059 | 0.015 | 0.018 | 0.015   | 0.022 | 0.022 | 0.022 | 0.020   | 0.023 |
| 26              | 0.050 | 0.051 | 0.059   | 0.056 | 0.083 | 0.084 | 0.084   | 0.086 | 0.028 | 0.028 | 0.036   | 0.029 |
| 10              | 0.040 | 0.042 | 0.042   | 0.041 | 0.068 | 0.072 | 0.070   | 0.065 | 0.052 | 0.052 | 0.050   | 0.049 |
| 2               | 0.025 | 0.023 | 0.034   | 0.029 | 0.080 | 0.077 | 0.078   | 0.079 | 0.024 | 0.025 | 0.035   | 0.026 |
| 17              | 0.013 | 0.014 | 0.010   | 0.013 | 0.063 | 0.060 | 0.065   | 0.063 | 0.032 | 0.030 | 0.022   | 0.032 |
| 4               | 0.085 | 0.087 | 0.080   | 0.086 | 0.086 | 0.084 | 0.079   | 0.085 | 0.046 | 0.048 | 0.049   | 0.049 |
| 14              | 0.017 | 0.018 | 0.023   | 0.017 | 0.070 | 0.072 | 0.075   | 0.069 | 0.030 | 0.031 | 0.030   | 0.027 |
| 8               | 0.070 | 0.070 | 0.064   | 0.067 | 0.050 | 0.053 | 0.055   | 0.052 | 0.055 | 0.055 | 0.038   | 0.056 |
| 18              | 0.016 | 0.017 | 0.013   | 0.015 | 0.074 | 0.074 | 0.072   | 0.072 | 0.025 | 0.027 | 0.026   | 0.025 |
| 24              | 0.008 | 0.010 | 0.007   | 0.010 | 0.060 | 0.058 | 0.056   | 0.060 | 0.009 | 0.011 | 0.009   | 0.011 |
| 16              | 0.019 | 0.017 | 0.025   | 0.017 | 0.076 | 0.075 | 0.084   | 0.076 | 0.023 | 0.022 | 0.027   | 0.024 |
| 7               | 0.065 | 0.065 | 0.065   | 0.066 | 0.077 | 0.074 | 0.070   | 0.077 | 0.035 | 0.034 | 0.036   | 0.029 |
| Prediction set  |       |       |         |       |       |       |         |       |       |       |         |       |
| 19              | 0.020 | 0.018 | 0.018   | 0.019 | 0.045 | 0.047 | 0.048   | 0.049 | 0.020 | 0.020 | 0.013   | 0.019 |
| 25              | 0.012 | 0.011 | 0.009   | 0.011 | 0.055 | 0.051 | 0.051   | 0.054 | 0.014 | 0.014 | 0.008   | 0.015 |
| 3               | 0.055 | 0.052 | 0.052   | 0.052 | 0.084 | 0.088 | 0.084   | 0.080 | 0.050 | 0.054 | 0.054   | 0.049 |
| 12              | 0.030 | 0.029 | 0.033   | 0.029 | 0.100 | 0.105 | 0.100   | 0.092 | 0.048 | 0.052 | 0.057   | 0.045 |
| 9               | 0.090 | 0.092 | 0.083   | 0.090 | 0.035 | 0.033 | 0.031   | 0.040 | 0.040 | 0.038 | 0.036   | 0.041 |
| 6               | 0.075 | 0.067 | 0.063   | 0.066 | 0.082 | 0.085 | 0.074   | 0.076 | 0.042 | 0.046 | 0.045   | 0.040 |

**Table S2.** Comparison of different methods for the quantitative analysis of the three thiols.

| Models  | thiols | Calibration |                        |                |                 |             | Cross-validation          |                          | Prediction           |                         | RSD (% , n=3) |       | Recovery (%) |
|---------|--------|-------------|------------------------|----------------|-----------------|-------------|---------------------------|--------------------------|----------------------|-------------------------|---------------|-------|--------------|
|         |        | <i>R</i>    | <i>R<sub>adj</sub></i> | <i>F</i> -test | <i>p</i> -value | <i>RMSE</i> | <i>R<sub>LOO-cv</sub></i> | <i>RMSE<sub>cv</sub></i> | <i>R<sub>p</sub></i> | <i>RMSE<sub>p</sub></i> | Intra         | Inter |              |
| TM      | Cys    | 0.9977      | 0.9973                 | 1156           | 6.58E-19        | 0.0436      | 0.9963                    | 0.0021                   | 0.9946               | 0.0037                  | 5.2           | 7.7   | 105.9        |
|         | GSH    | 0.9900      | 0.9880                 | 259.4          | 8.97E-14        | 0.0520      | 0.9860                    | 0.0029                   | 0.9939               | 0.0062                  | 5.6           | 8.7   | 97.0         |
|         | Hcy    | 0.9968      | 0.9954                 | 341.7          | 1.57E-13        | 0.0387      | 0.9938                    | 0.0017                   | 0.9914               | 0.0035                  | 4.3           | 6.5   | 97.90        |
| MCR-ALS | Cys    | 0.9740      | 0.9726                 | 333.0          | 4.64E-13        | 0.0768      | 0.9676                    | 0.0062                   | 0.9909               | 0.0062                  | 7.7           | 12.1  | 84.62        |
|         | GSH    | 0.9586      | 0.9536                 | 96.2           | 5.37E-10        | 0.0742      | 0.9460                    | 0.0058                   | 0.9875               | 0.0042                  | 5.9           | 9.2   | 98.51        |
|         | Hcy    | 0.9230      | 0.9135                 | 48.9           | 8.87E-08        | 0.0800      | 0.8975                    | 0.0068                   | 0.9871               | 0.0058                  | 9.2           | 14.5  | 103.1        |
| N-PLS   | Cys    | 0.9962      | 0.9960                 | 2345           | 1.60E-20        | 0.0539      | 0.9932                    | 0.0029                   | 0.9945               | 0.0222                  | 4.8           | 7.6   | 87.08        |
|         | GSH    | 0.9877      | 0.9870                 | 717.3          | 5.92E-16        | 0.0632      | 0.9754                    | 0.0039                   | 0.9977               | 0.0255                  | 4.8           | 7.4   | 96.70        |
|         | Hcy    | 0.9909      | 0.9903                 | 971.2          | 4.09E-17        | 0.0539      | 0.9826                    | 0.0029                   | 0.9964               | 0.0135                  | 5.0           | 7.7   | 97.07        |

correlation coefficients (*R*), adjusted correlation coefficients (*R<sub>adj</sub>*), root mean square error (*RMSE*), correlation coefficient with leave-one-out (*R<sub>LOO-cv</sub>*), root mean square error of cross validation (*RMSE<sub>cv</sub>*), correlation coefficients of prediction (*R<sub>p</sub>*), root mean square error of prediction (*RMSE<sub>p</sub>*).
